# Supplementary material for: Sprouty2 positively regulates T cell function and airway inflammation through regulation of CSK and LCK kinases
Source: PubMed Central journal article supplement (PMC7971865; doi:10.1371/journal.pbio.3001063), 2021-03-08

Full unedited Blot for Figure 1A

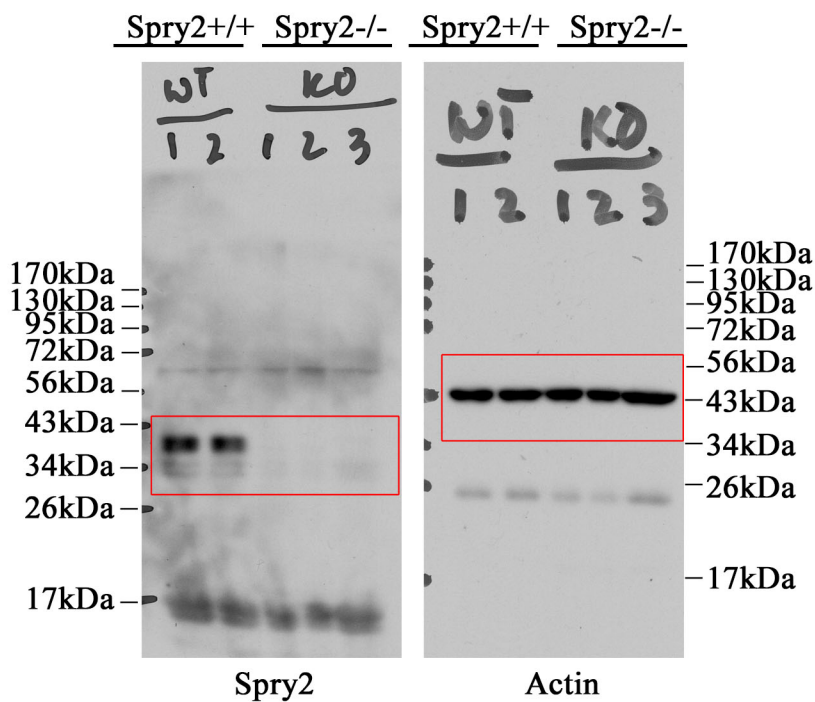

Full unedited Blot for Figure 1H

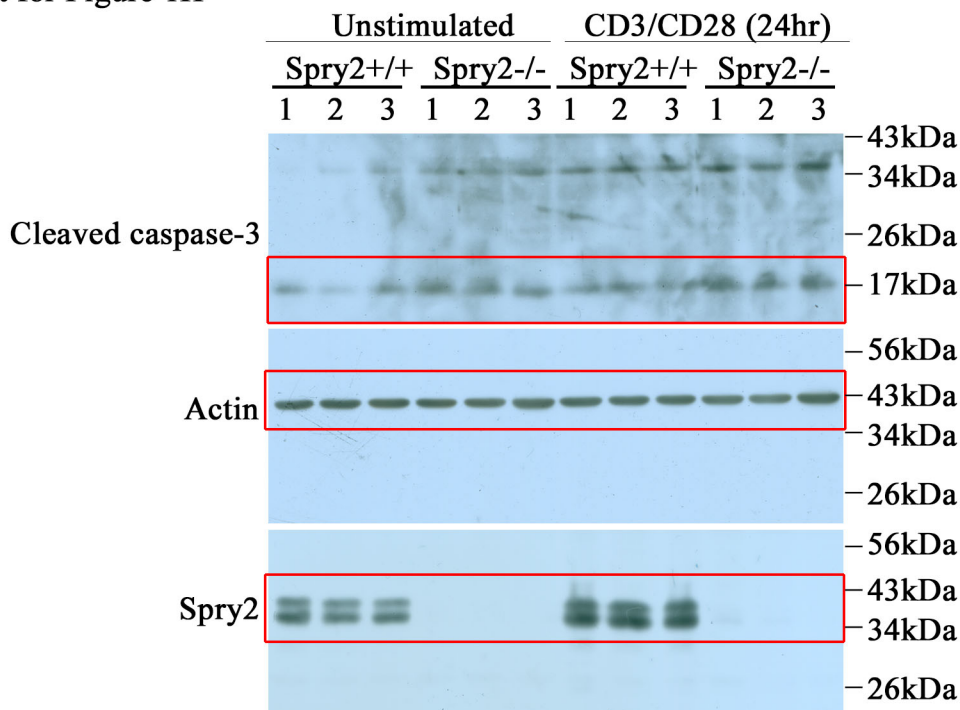

Full unedited Blot for Figure 2 A and 2 E

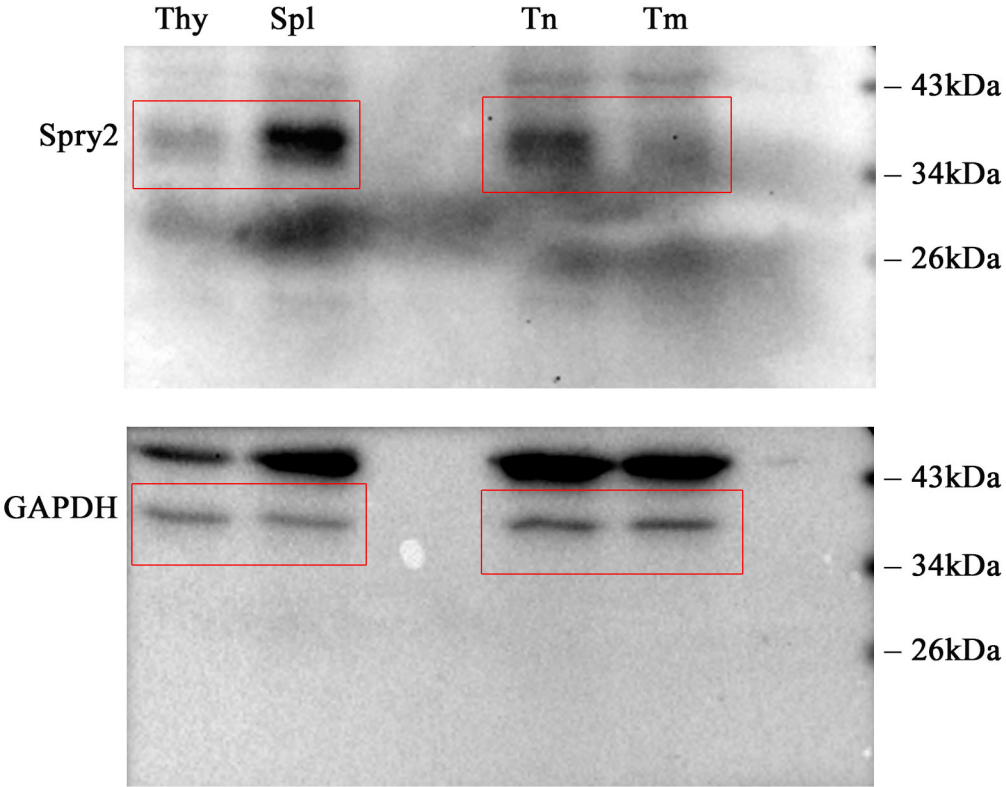

Full unedited Blot for Figure. 2 C

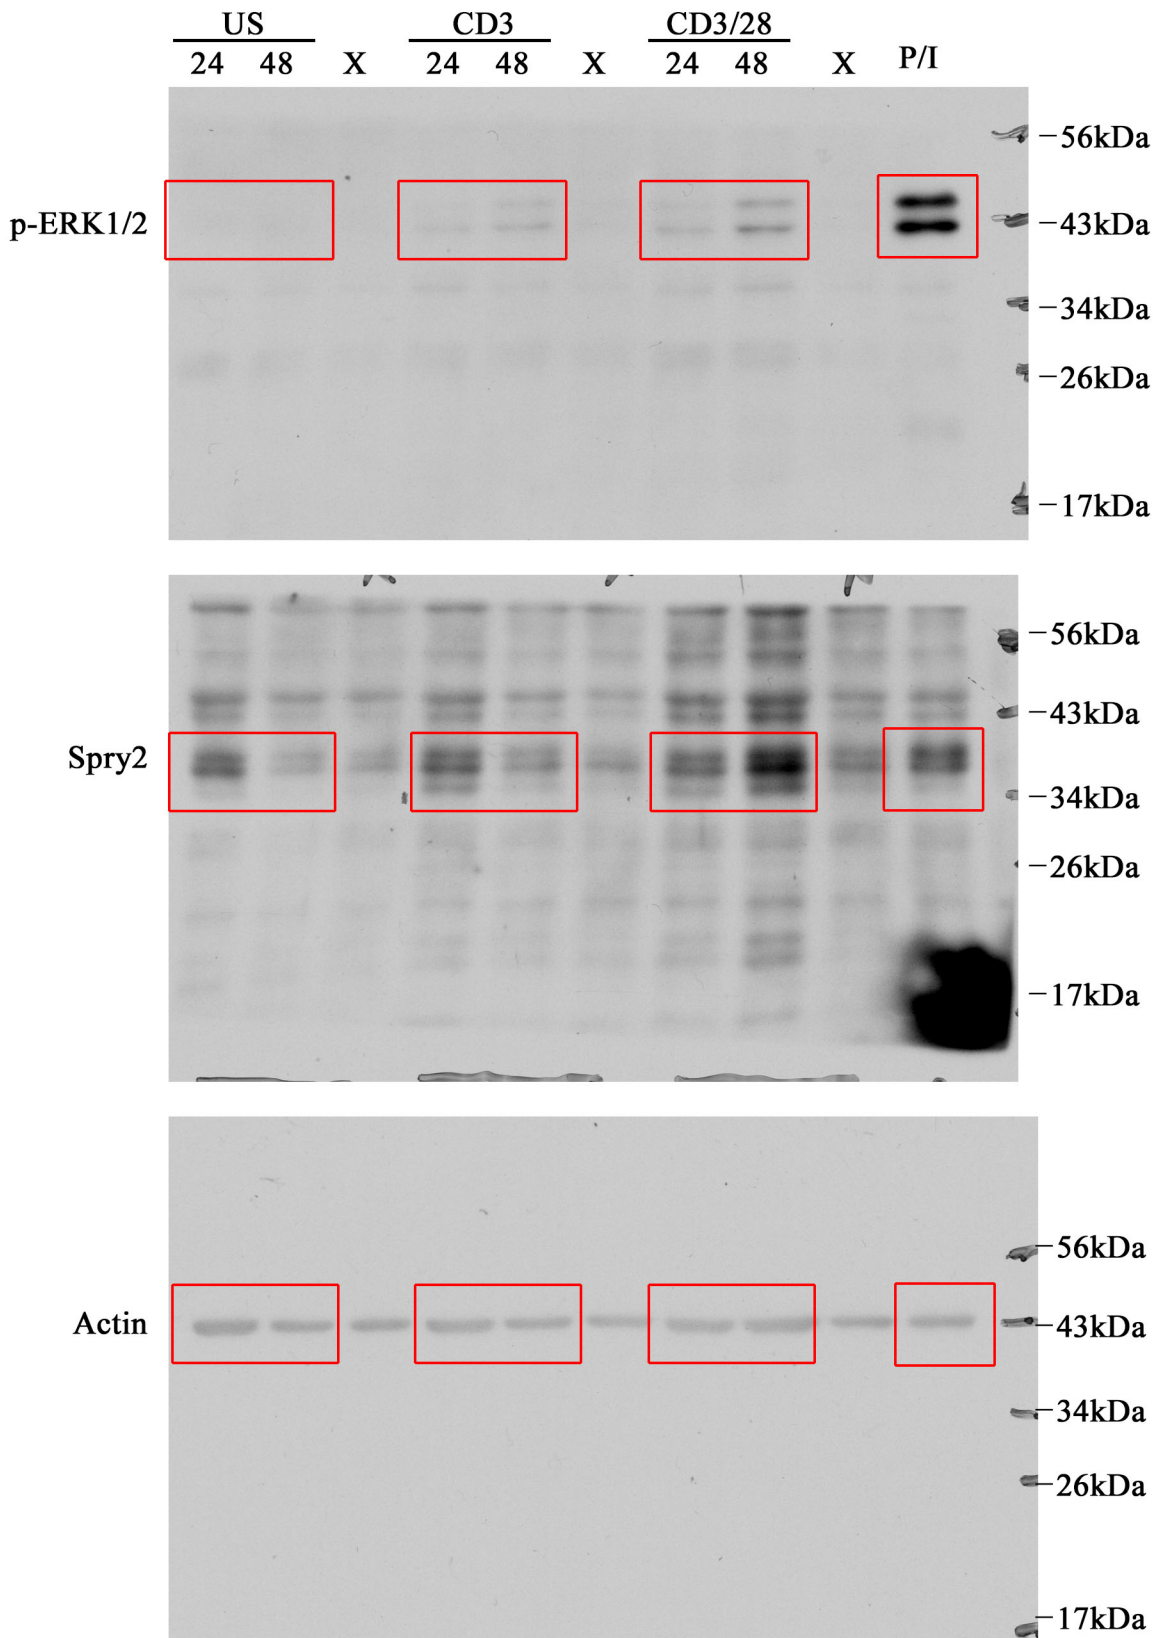

Full unedited Blot for Figure 2G

Blots here were probed with ECL reagent and images are acquired using BioRad ChemiDoc

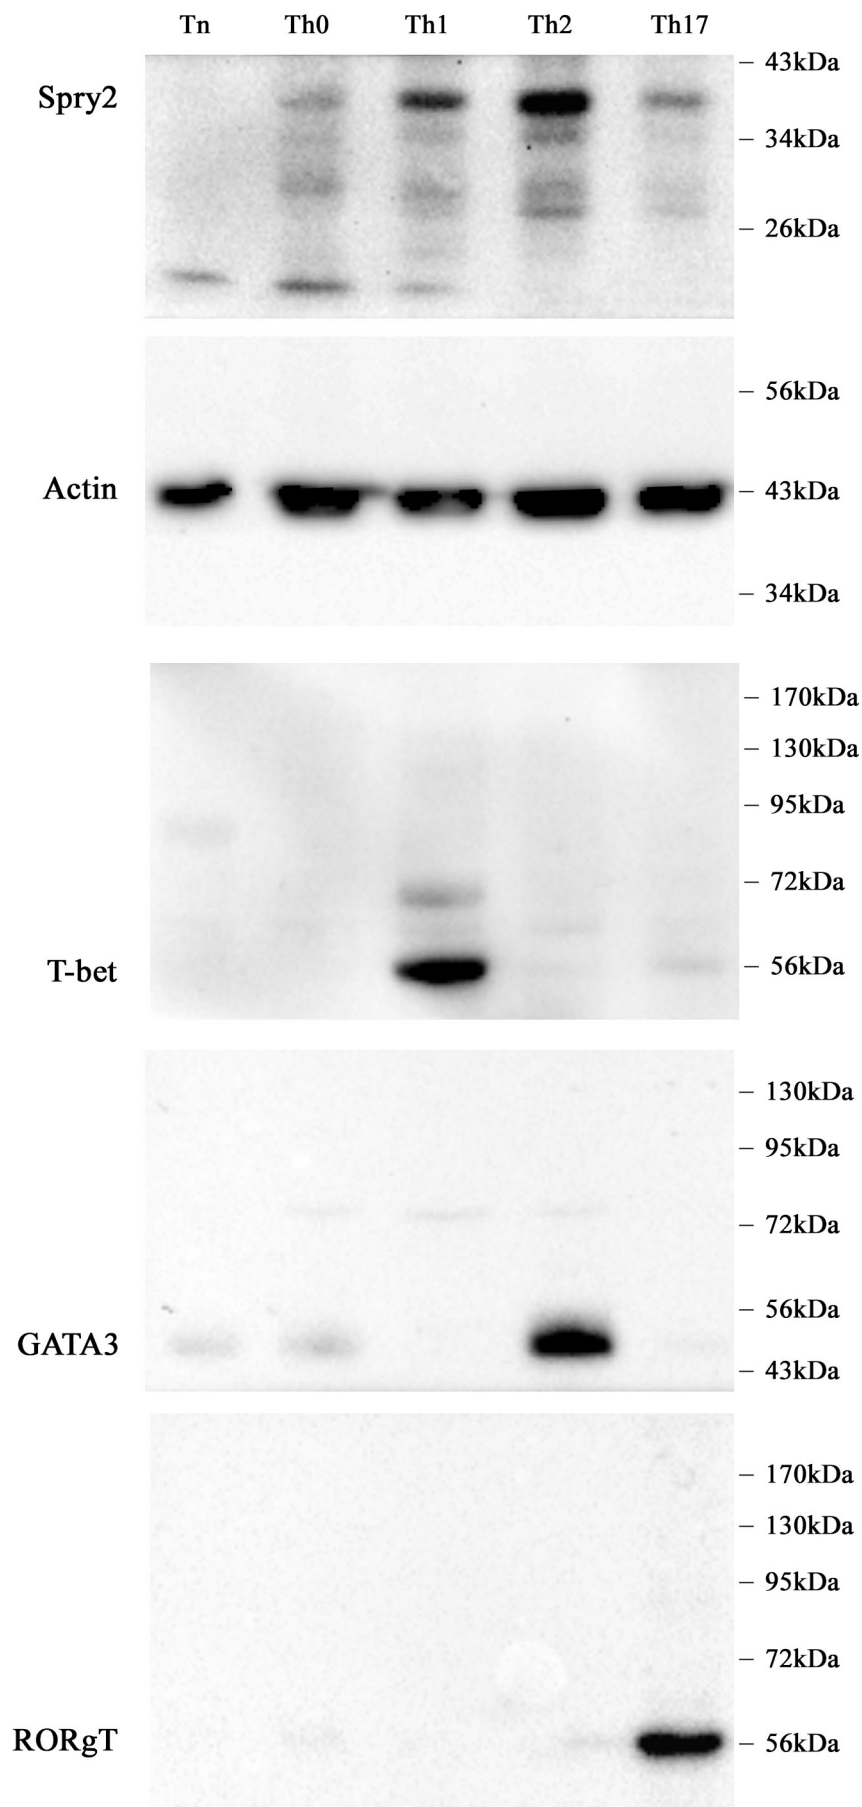

Full unedited Blot for Figure 2 H

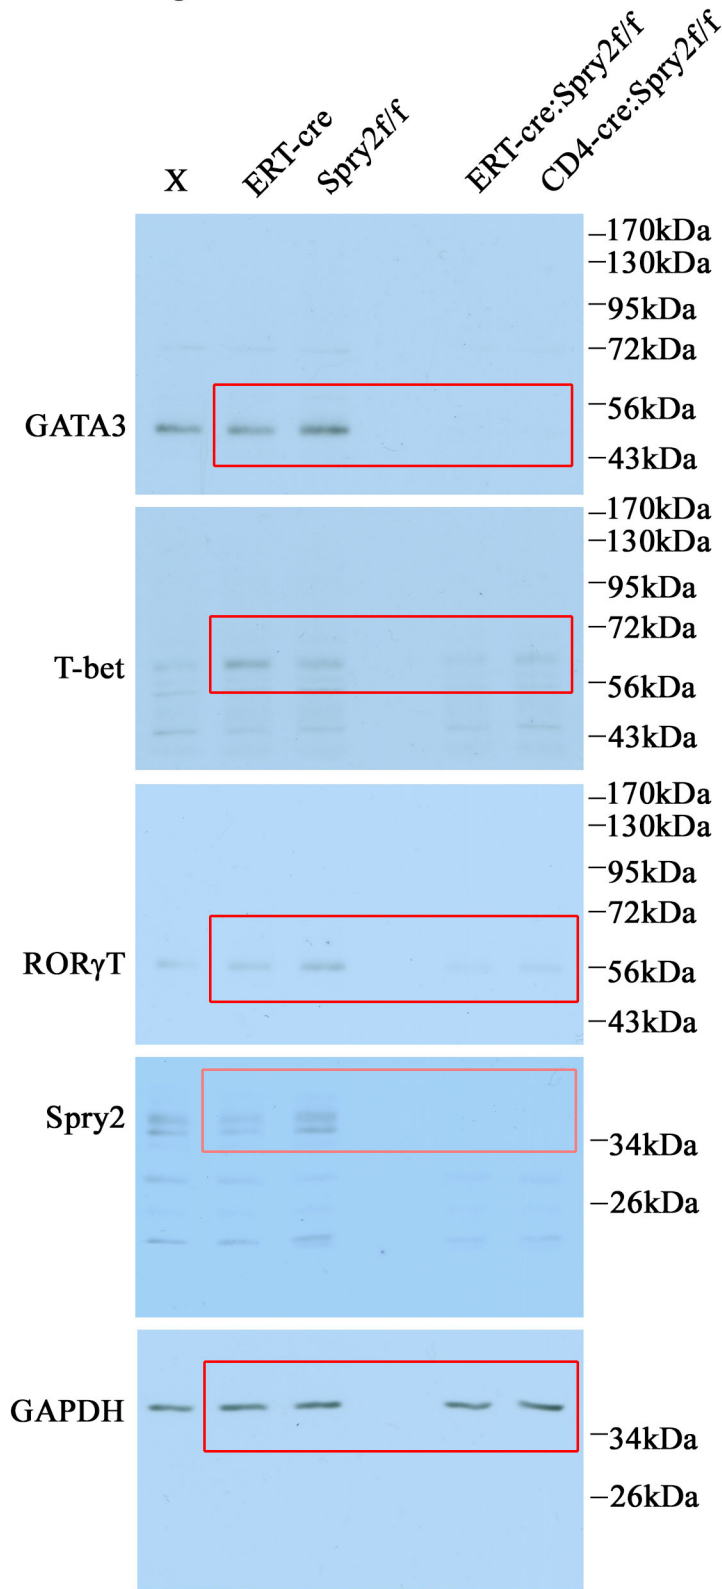

Full unedited Blot for Figure. 2 J

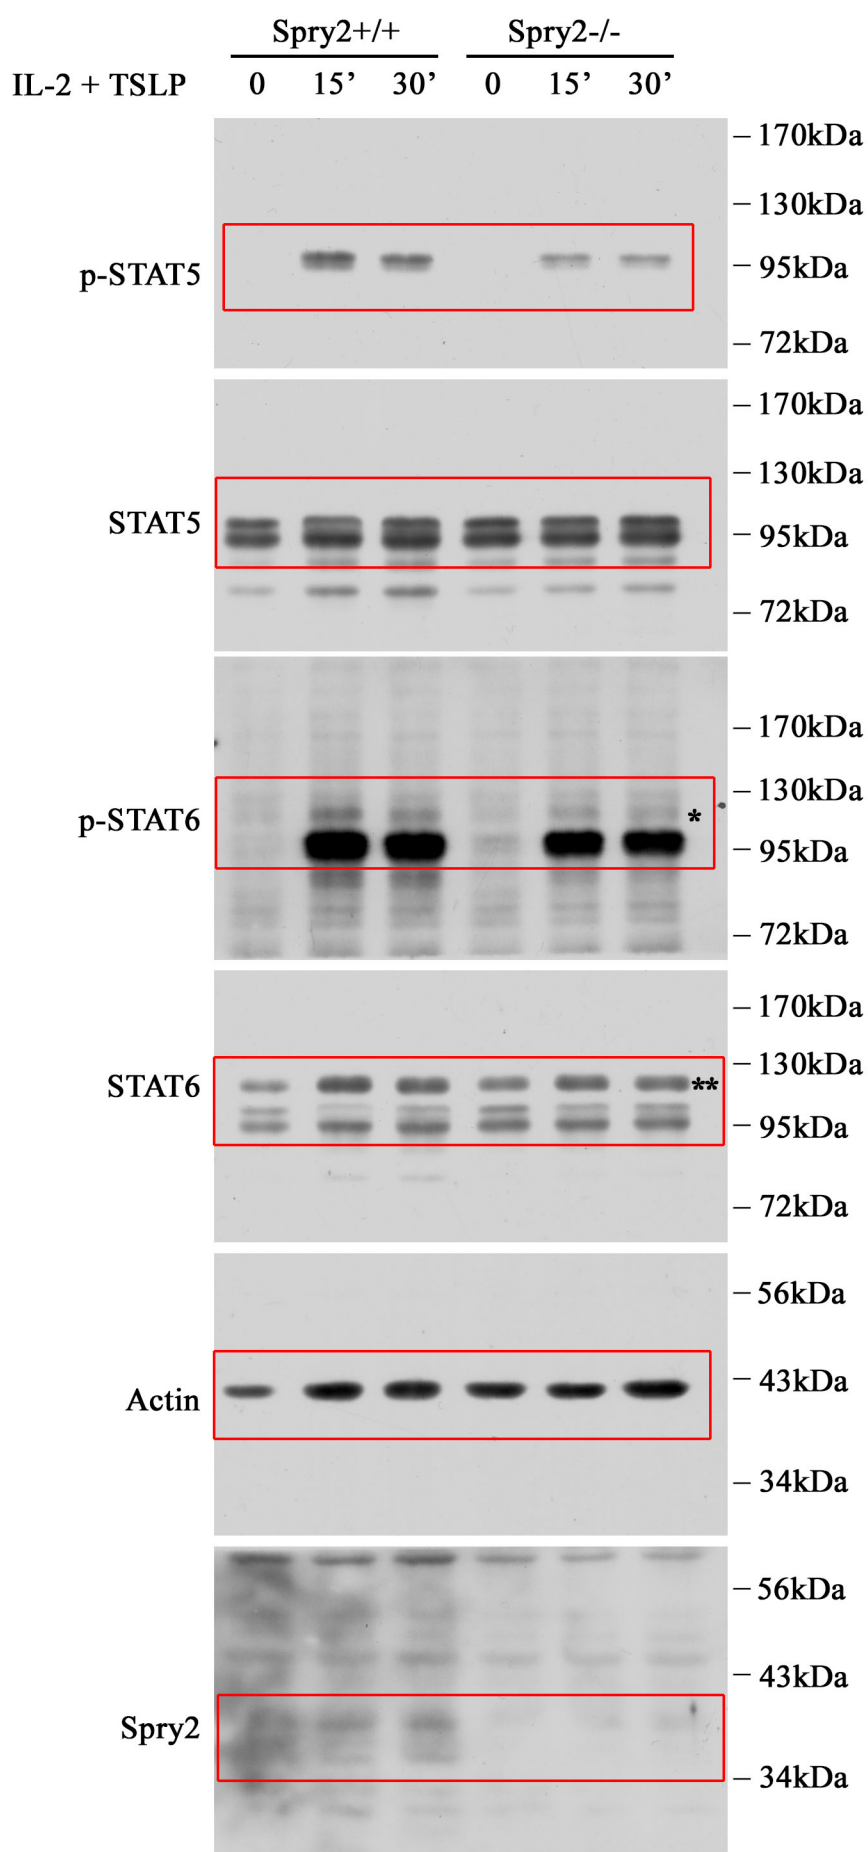







Full unedited Blot for Figure 6B (Cont'd)

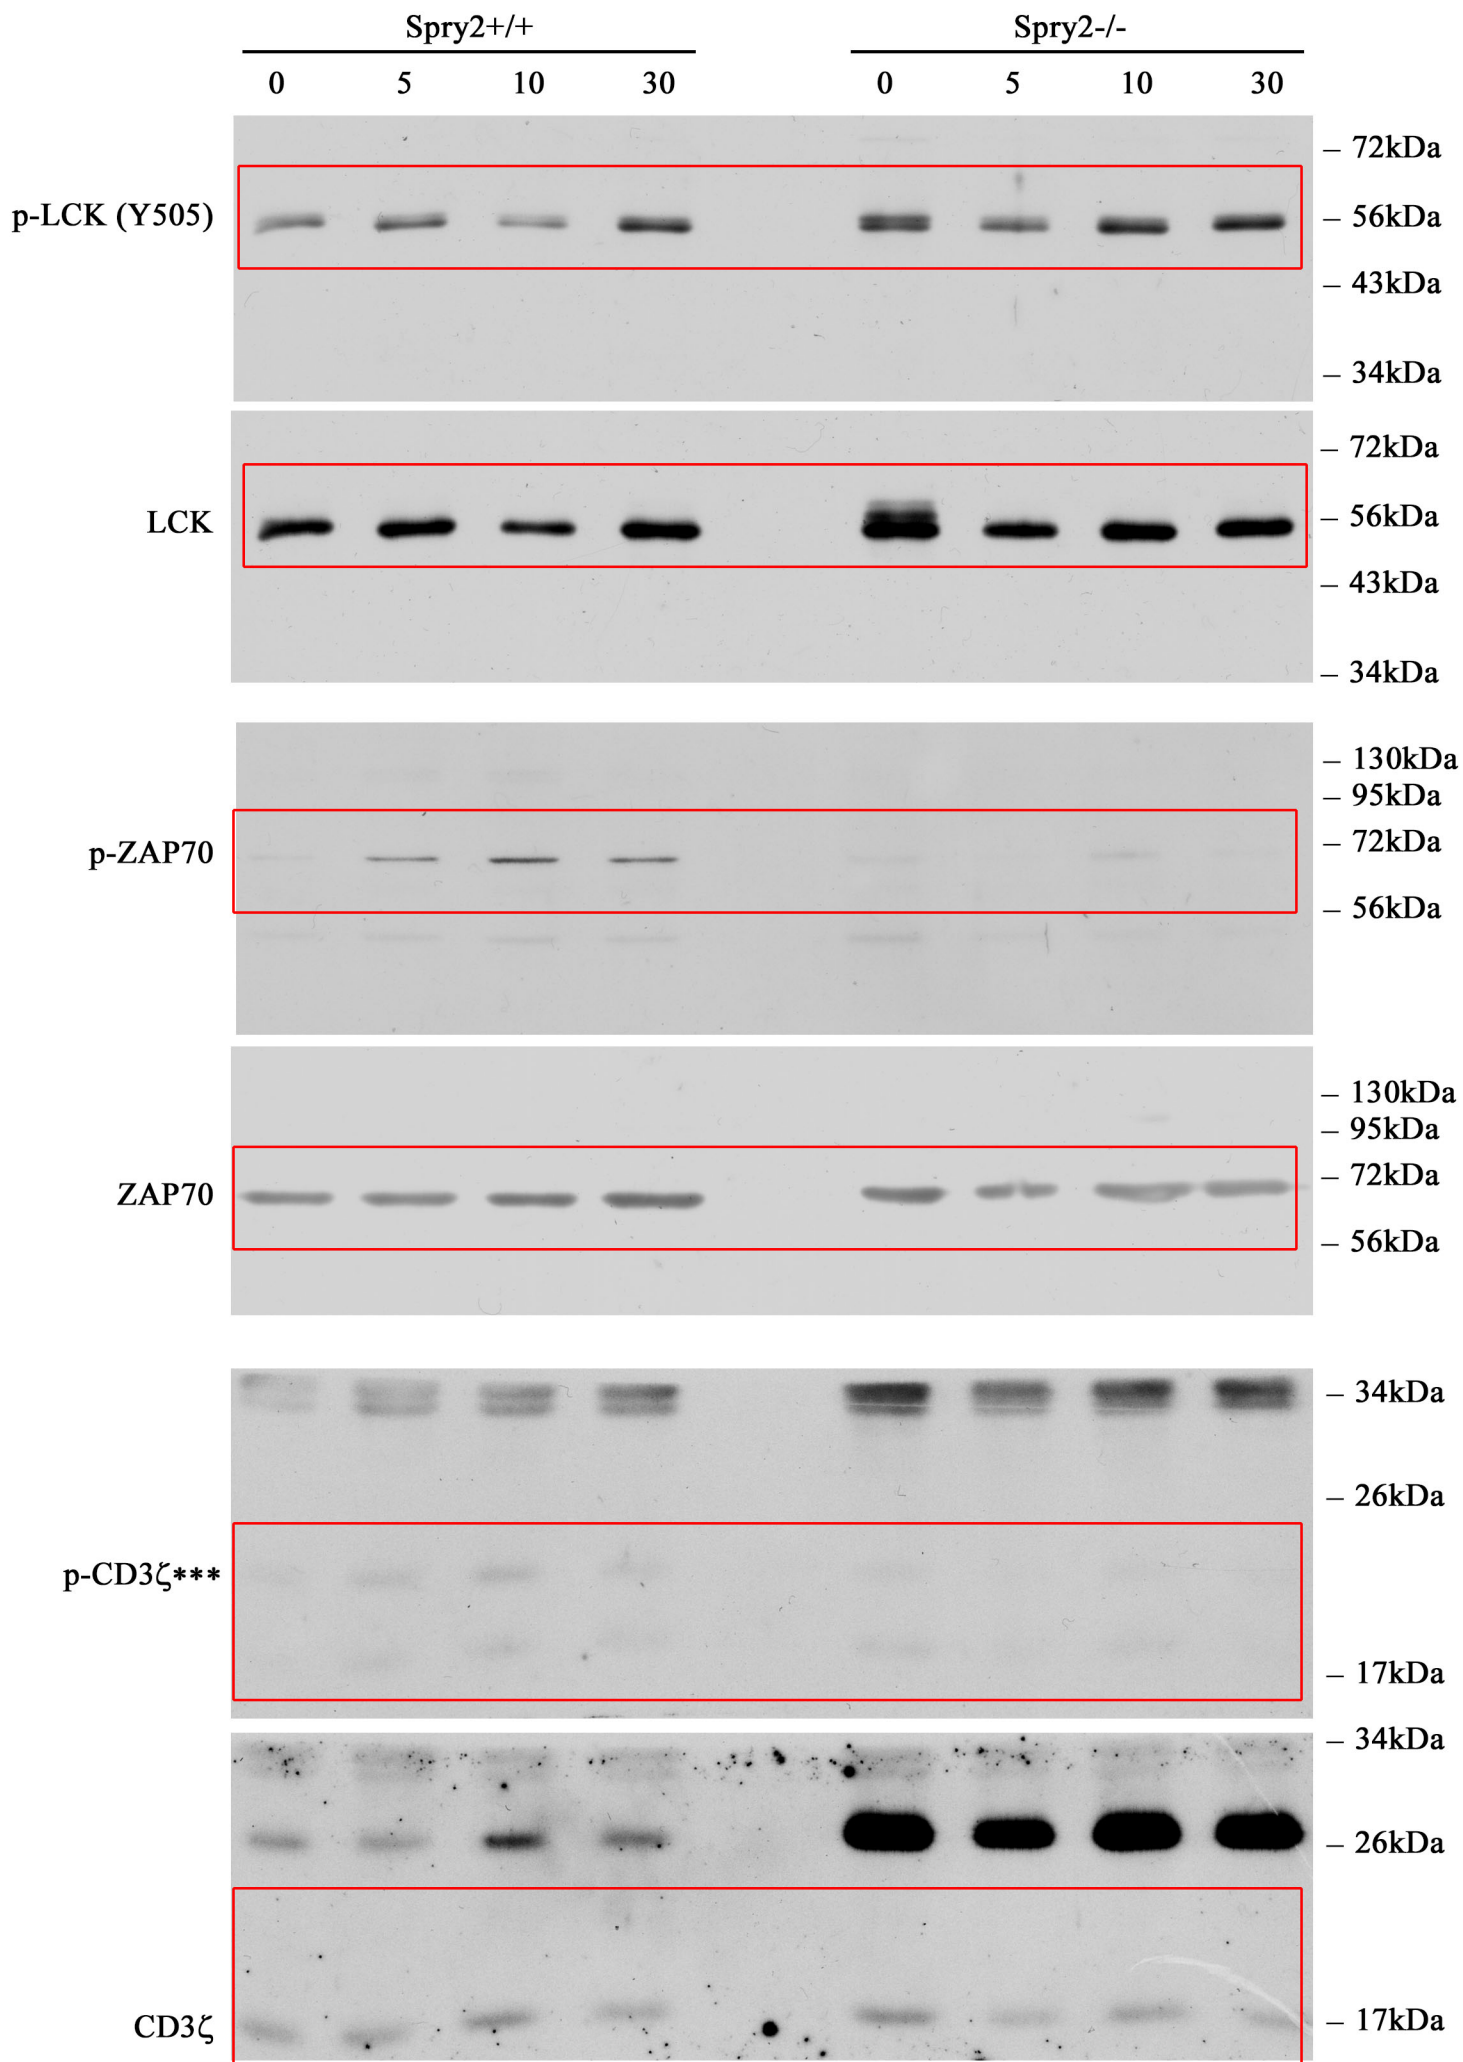

Full unedited Blot for Figure 6 F & G

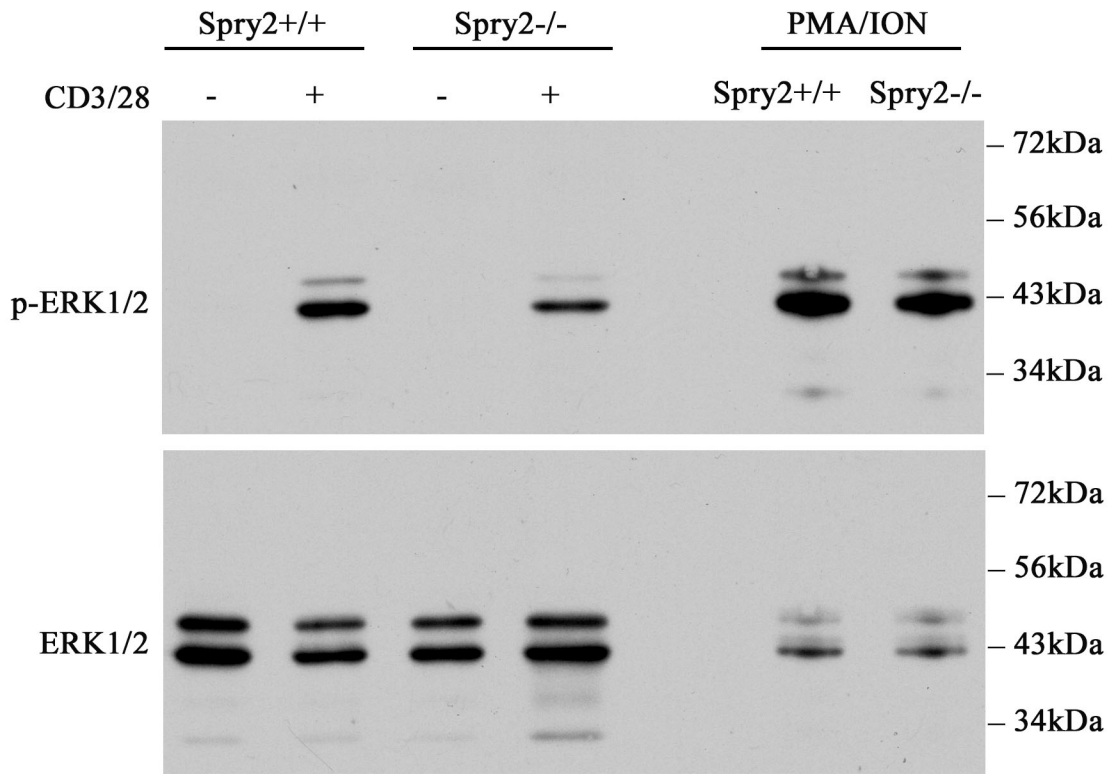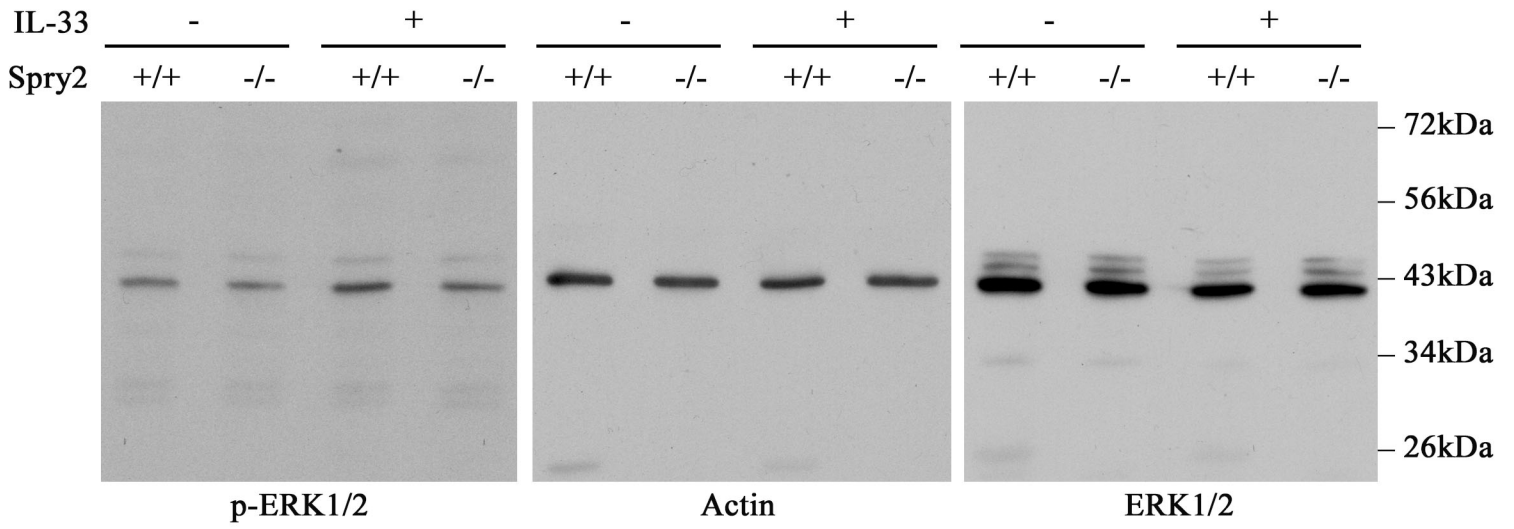

Full unedited Blot for Figure 7 C

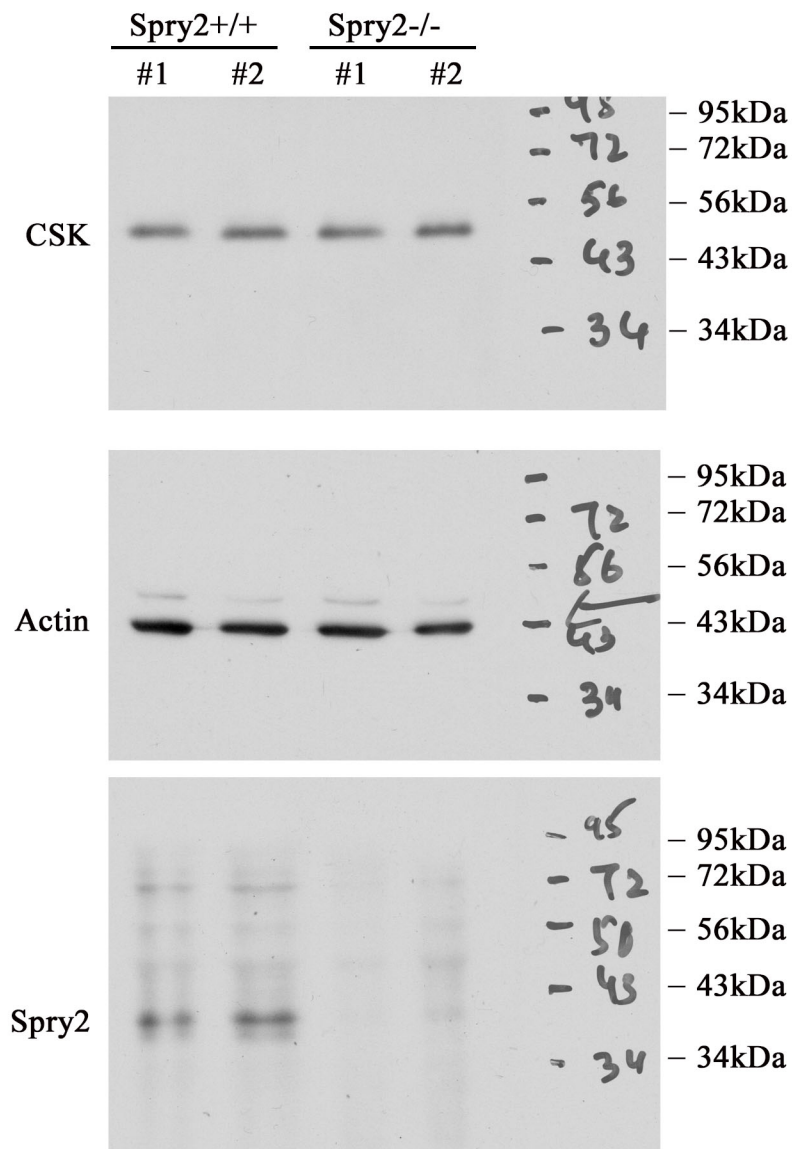

Full unedited Blot for Figure 7 D & E

Blots here were probed with ECL reagent and images are acquired using BioRad ChemiDoc

Figure 7 D

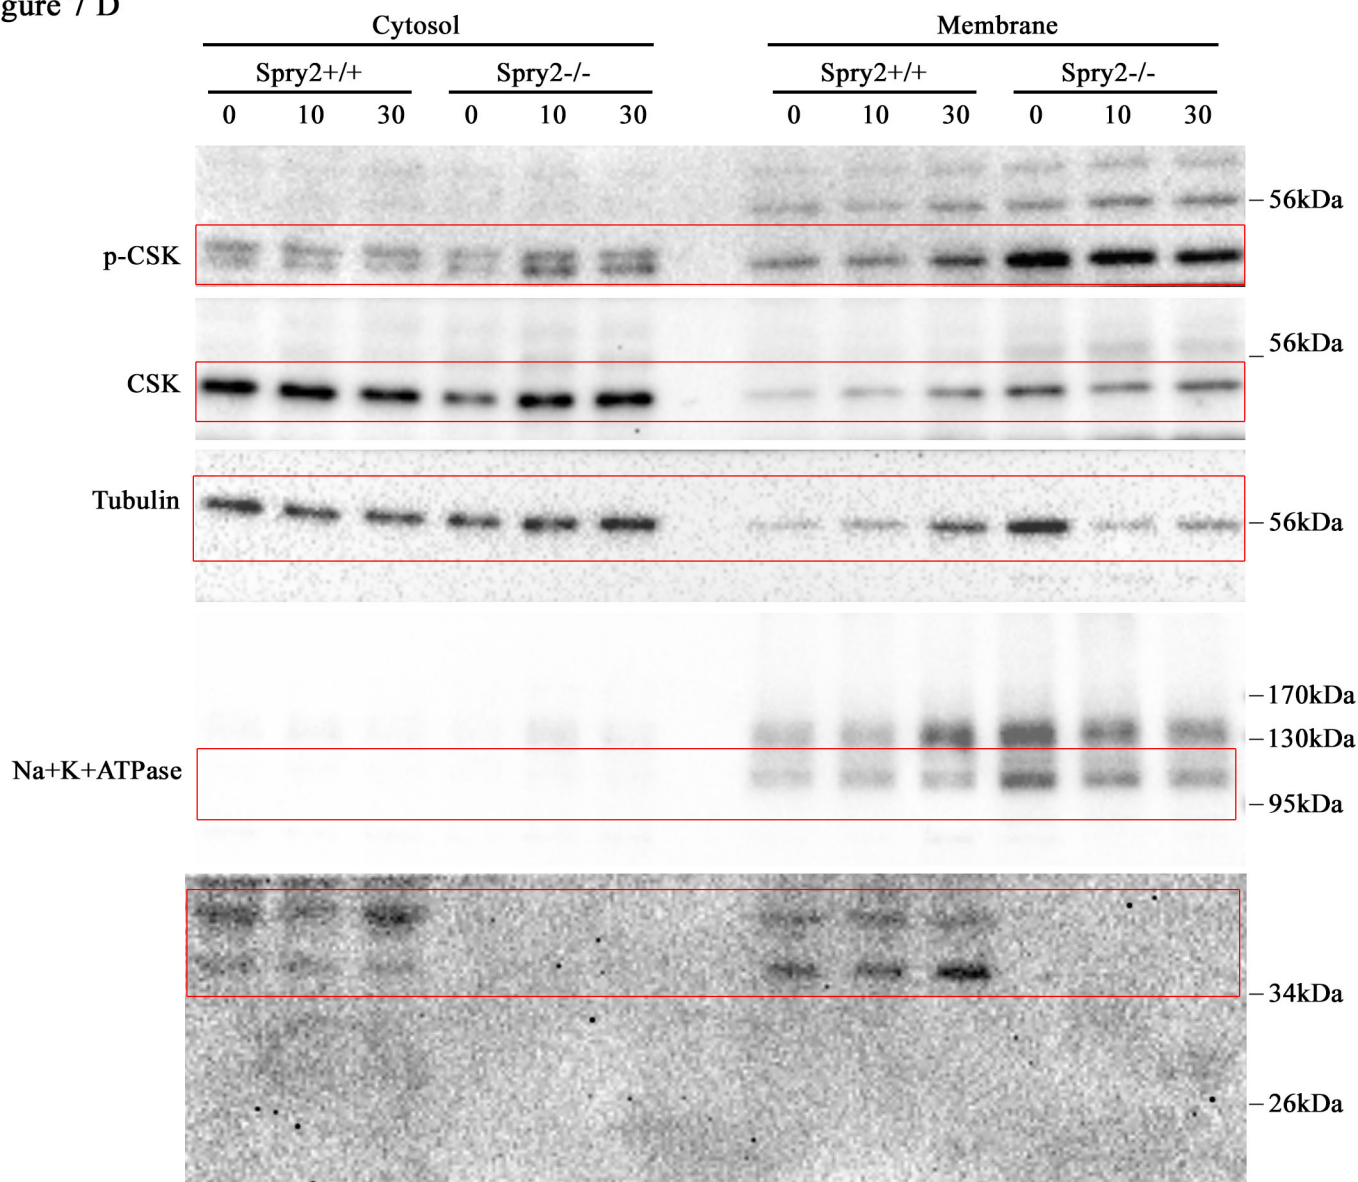

Figure 7 E

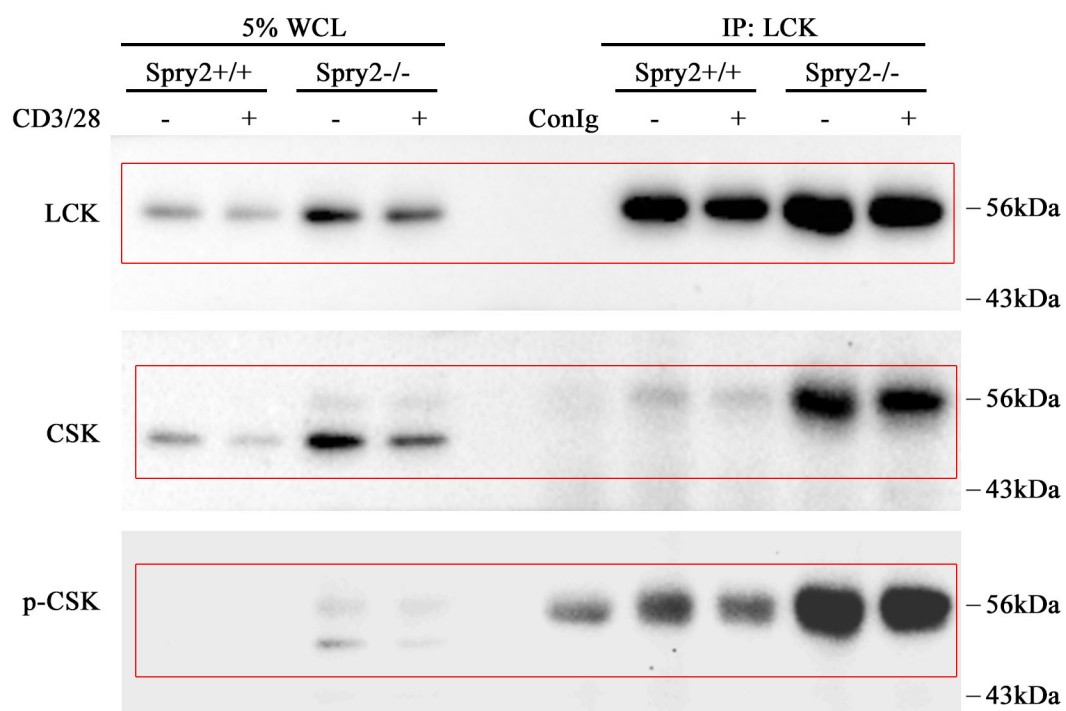

Full unedited Blot for Figure 8 A

Blots here were probed with ECL reagent and images are aquired using BioRad ChemiDoc

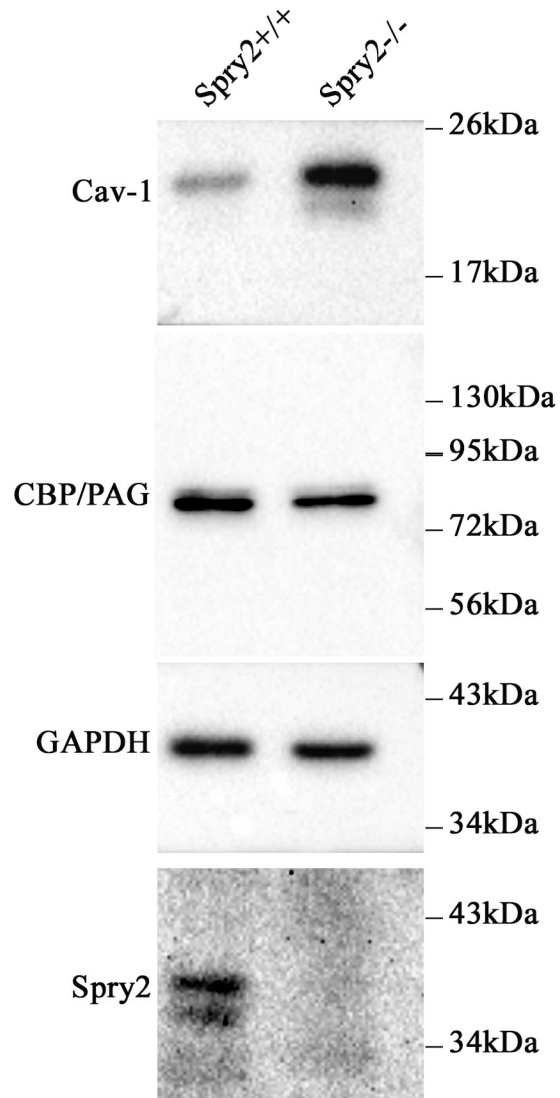

Full unedited Blot for Figure 8 B

Blots here were probed with ECL reagent and images are aquired using BioRad ChemiDoc

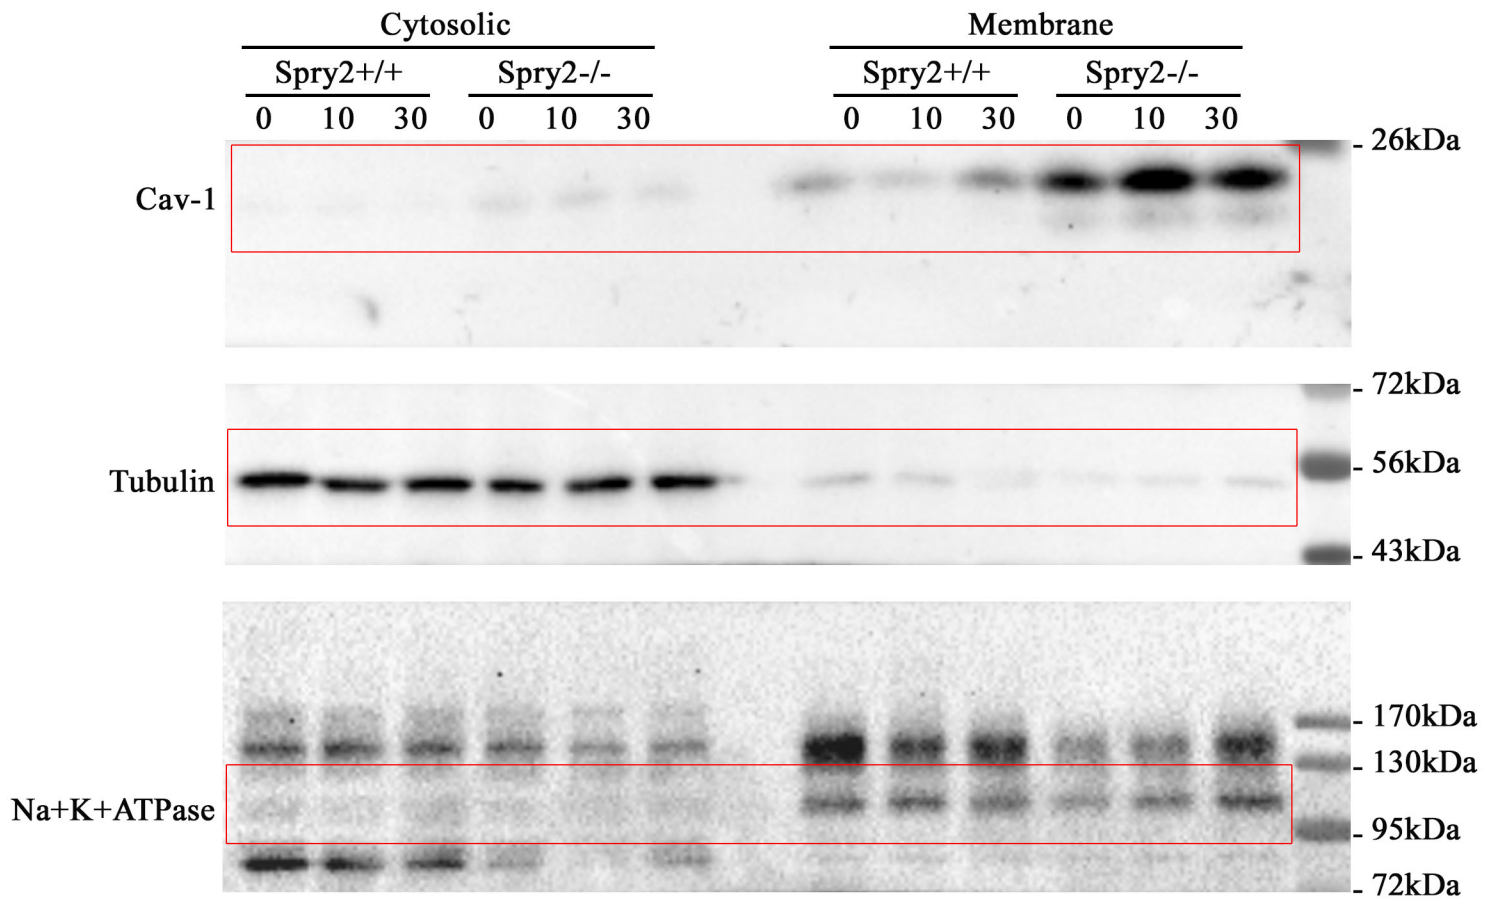

Full unedited Blot for Figure 8 G

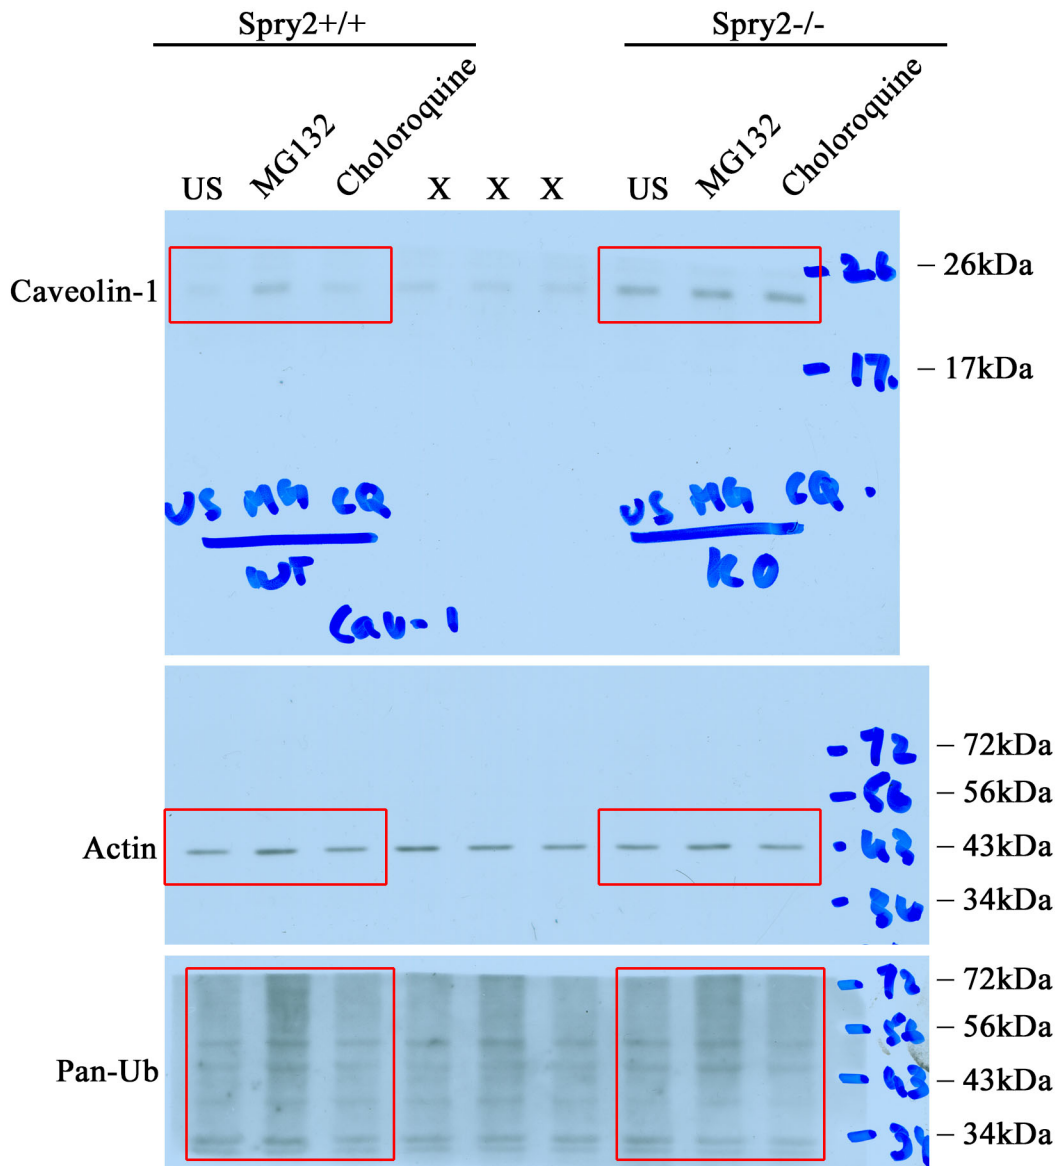

Full unedited Blot for Figure 8 H

Blots here were probed with ECL reagent and images are aquired using BioRad ChemiDoc

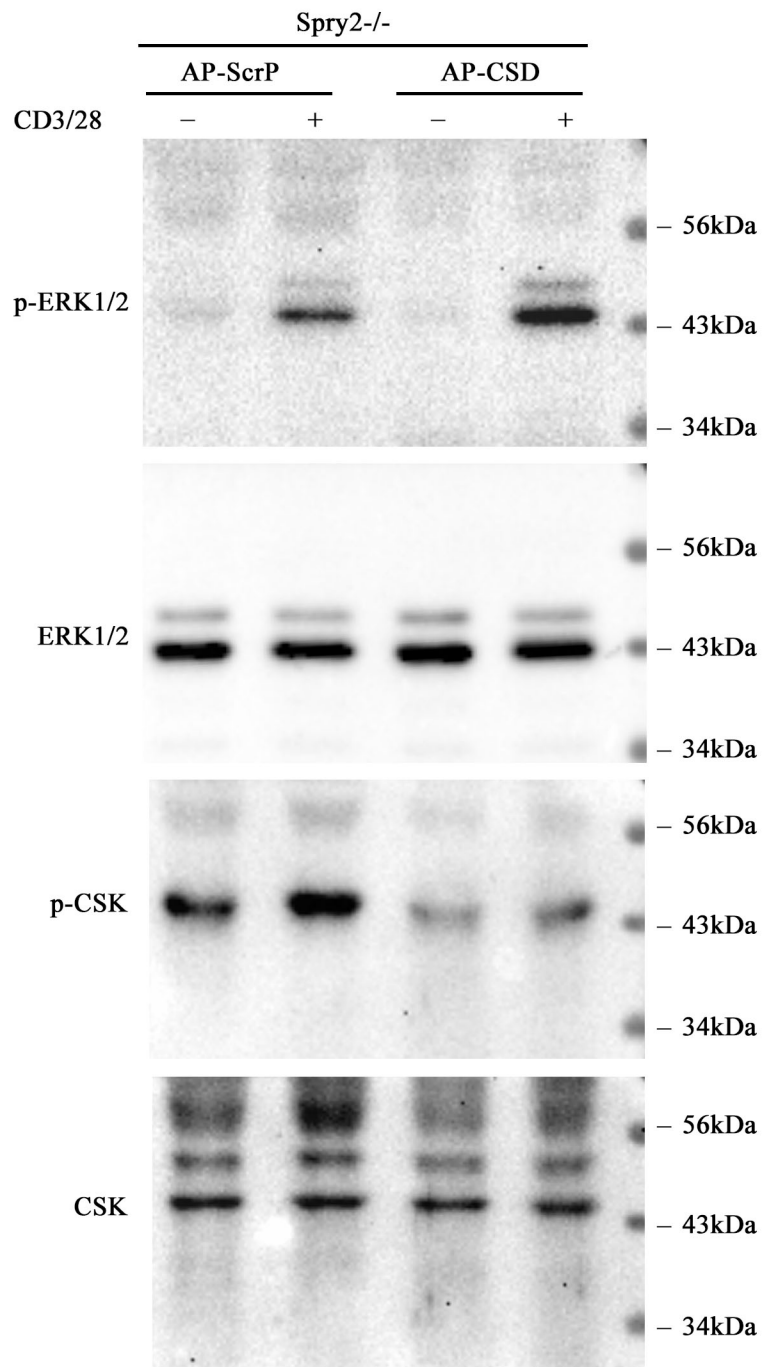



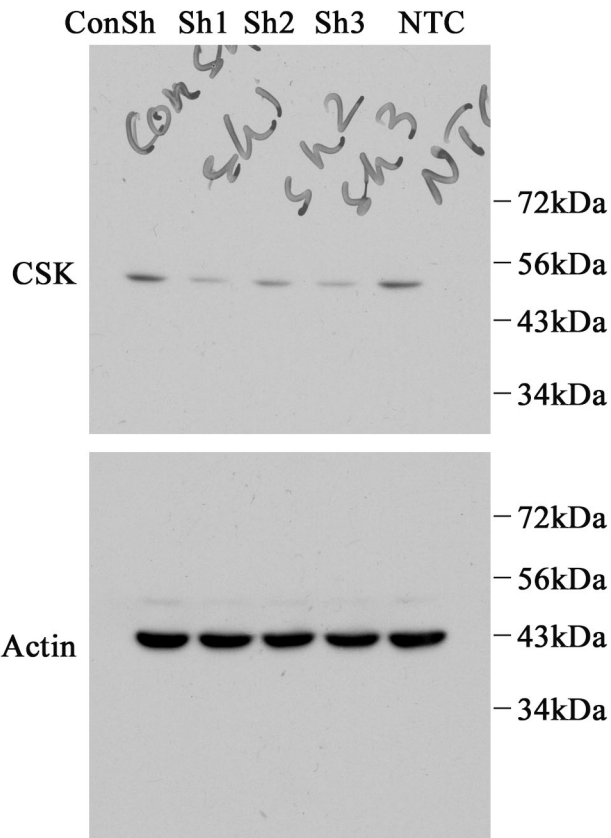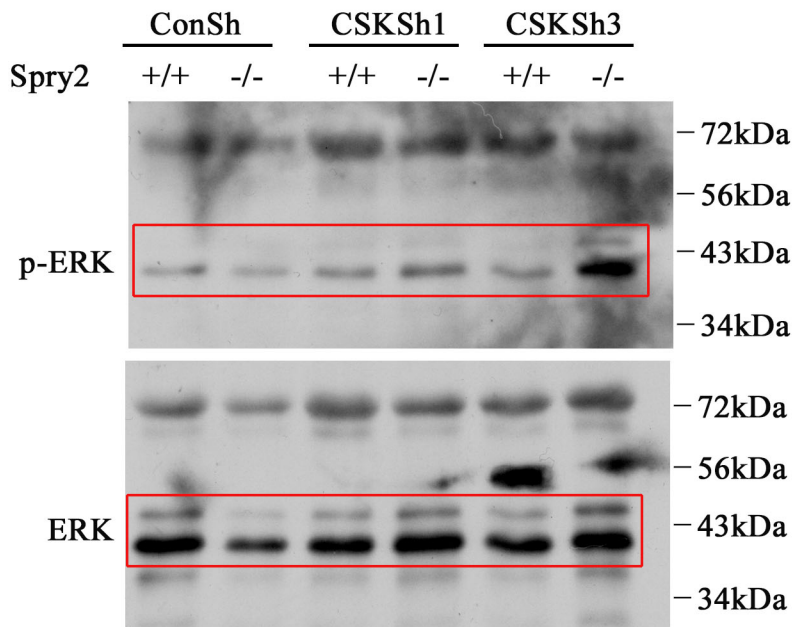

Full unedited Blot for Supplementary Figure 4 B

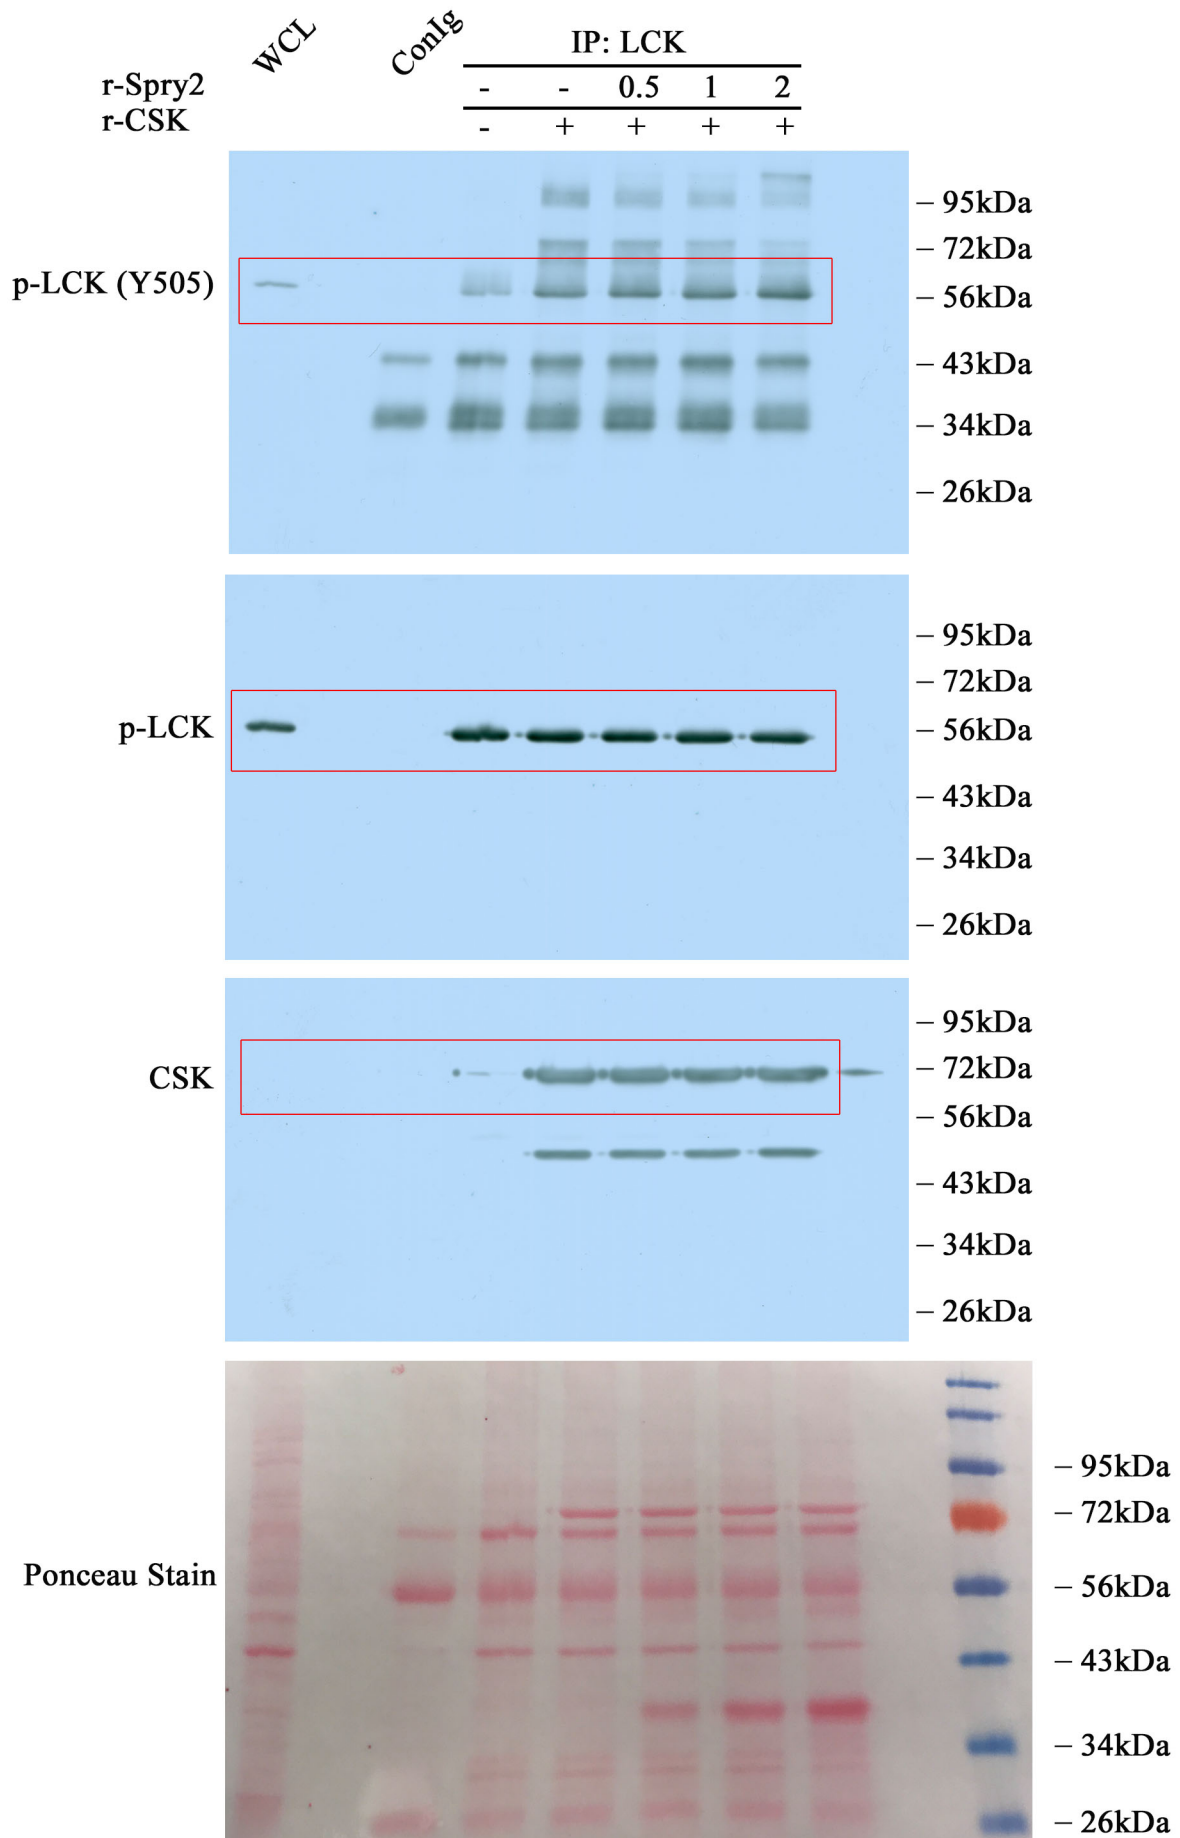

Fig 1C & E Gating strategy

Spleen

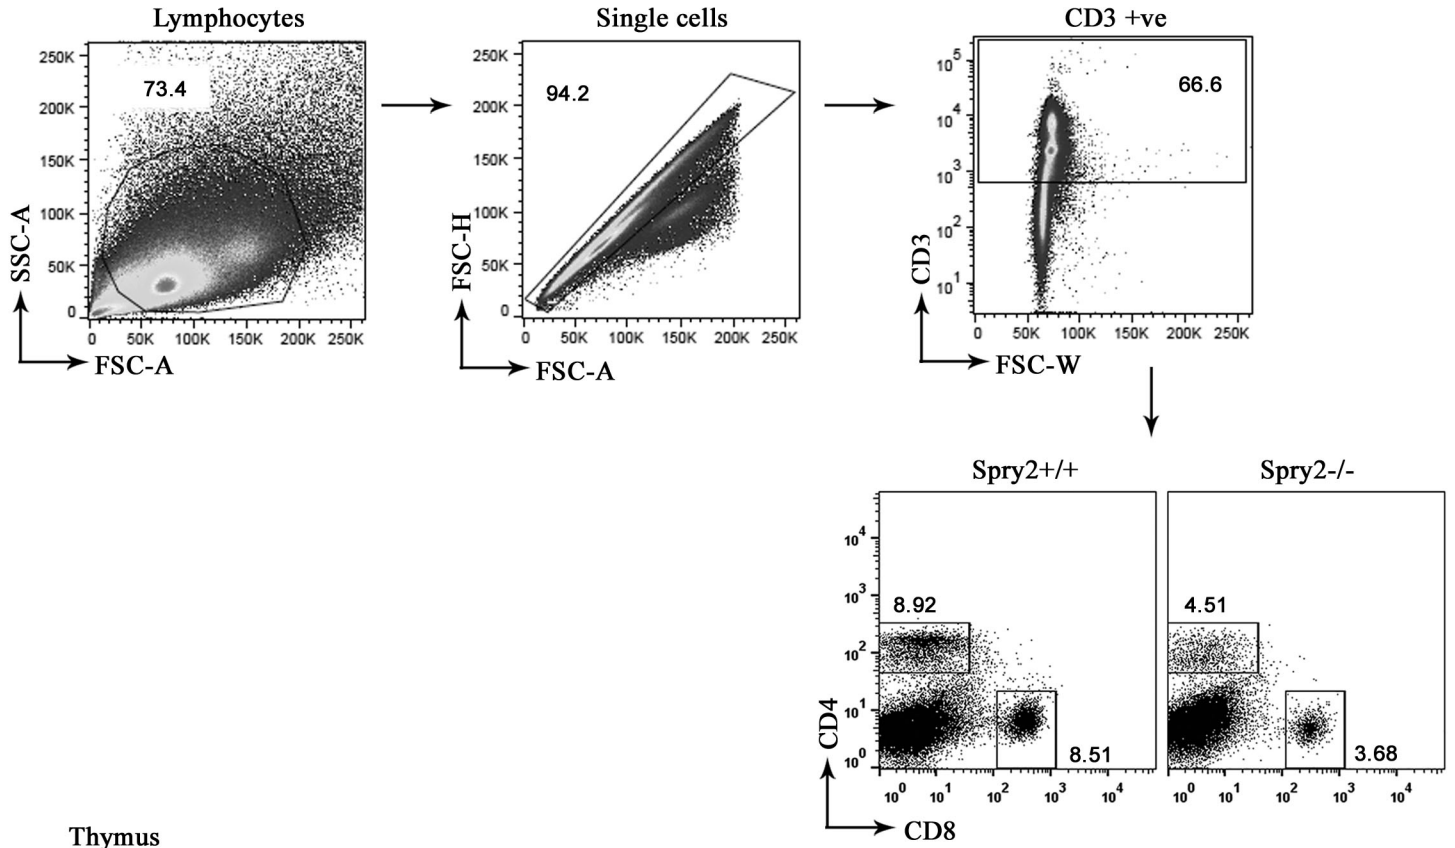

Thymus

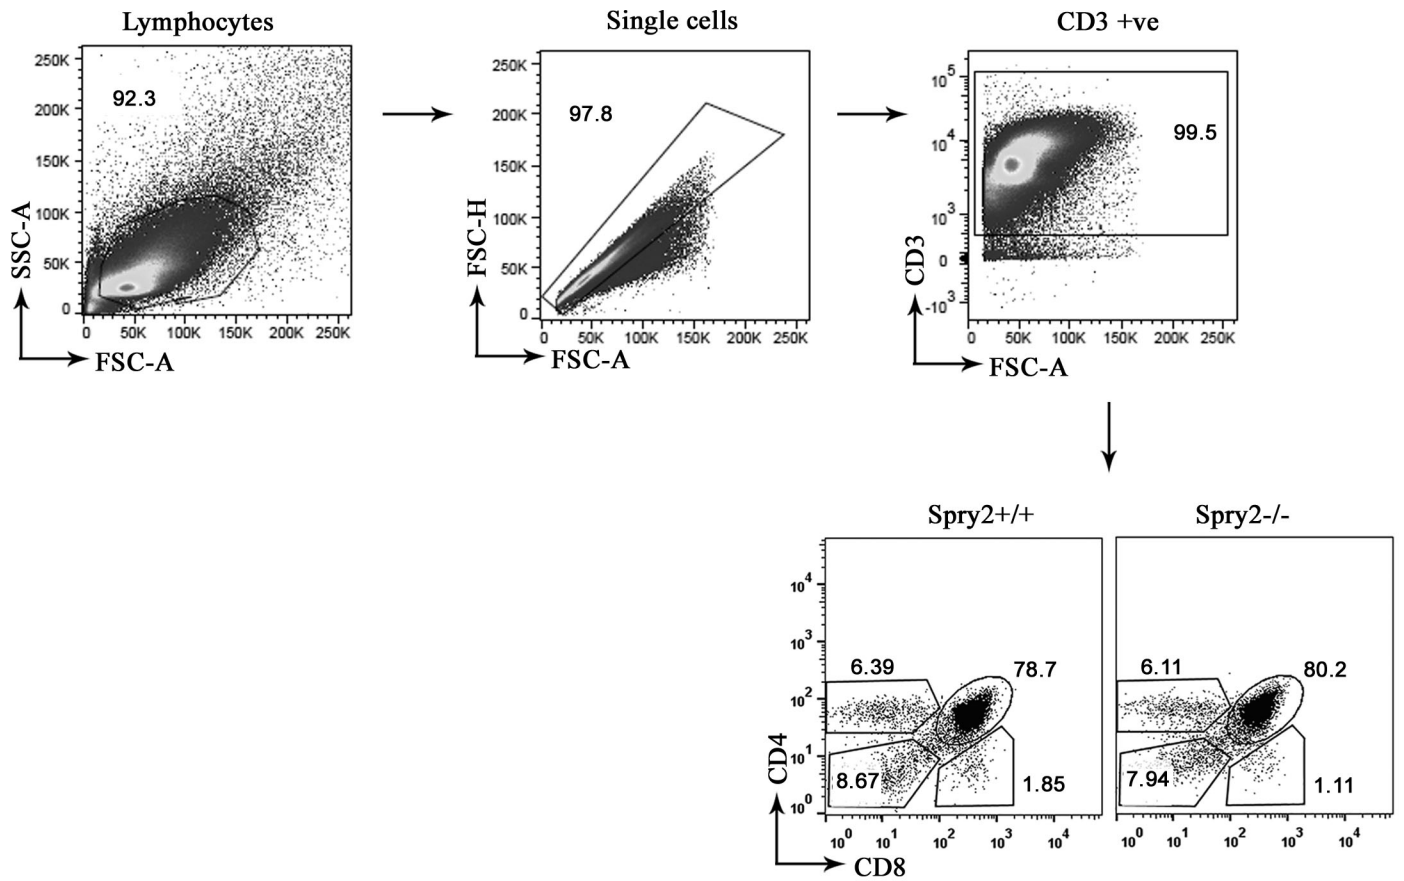

Fig 5A Gating strategy for CD4 T cells from Blood PBMCs and BAL

Blood PBMCs

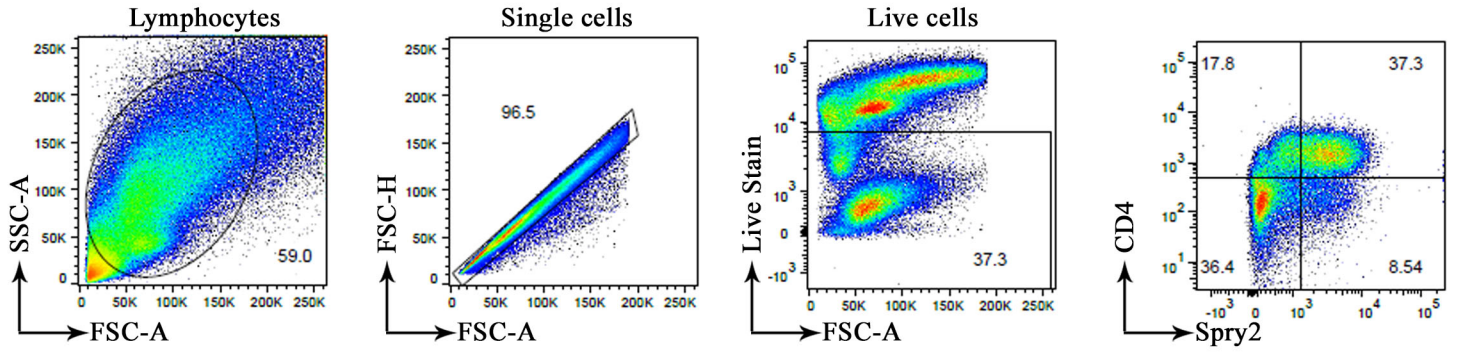

BAL

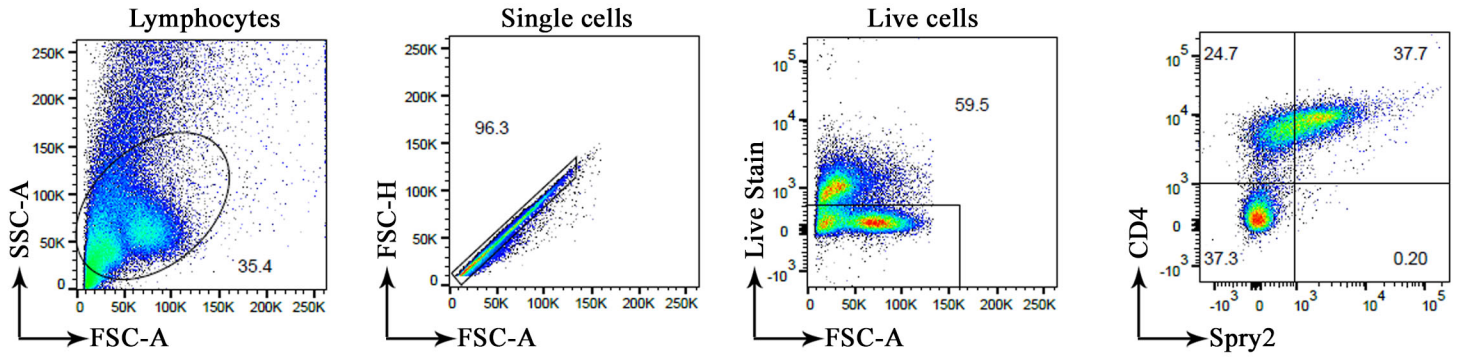

Supplement: pbio.3001063.s004.pdf [file pbio.3001063.s004.pdf]
