# Supplementary material for: Sprouty2 positively regulates T cell function and airway inflammation through regulation of CSK and LCK kinases
Source: PubMed Central journal article supplement (PMC7971865; doi:10.1371/journal.pbio.3001063), 2021-03-08
Supplement: pbio.3001063.s001.pdf [file pbio.3001063.s001.pdf]

S1Table. Demographic and clinical characteristics of the study patients

| Parameters                    | Asthmatic patients                                                                                                                            | Disease controls                                                                                                                                |
|-------------------------------|-----------------------------------------------------------------------------------------------------------------------------------------------|-------------------------------------------------------------------------------------------------------------------------------------------------|
| N                             | 8                                                                                                                                             | 8                                                                                                                                               |
| Diagnoses                     | 8 patients with asthma; 8 patients with allergic rhinitis, 7 with chronic sinusitis, 6 with GERD, 1 with bronchiectasis and 1 with aspiration | 8 patients with chronic cough and concurrent allergic rhinitis & GERD, 1 patients with bronchiectasis, 2with chronic aspiration and 1 with COPD |
| Male/female                   | 3/5                                                                                                                                           | 4/4                                                                                                                                             |
| Age                           | 53.2 ± 4 (53)                                                                                                                                 | 51.7 ± 4 (53)                                                                                                                                   |
| FEV1 (%)                      | 72 ± 4 (72 <sup>α</sup> )*                                                                                                                    | 88.7 ± 3 (89)                                                                                                                                   |
| Reversibility (%)             | 15.0 ± 6 (13)*                                                                                                                                | 3.0 ± 0.7 (1)                                                                                                                                   |
| PC20 (mg/ml) for methacholine | 2.8 ± 0.5 (2.1)*a                                                                                                                             | 23.8 ± 0.7 (24)                                                                                                                                 |
| Allergy skin test positivity  | 8                                                                                                                                             | 8                                                                                                                                               |
| Eosinophils /μL blood         | 490 ± 88 (300)*                                                                                                                               | 100 ± 22 (100)                                                                                                                                  |
| Total IgE (KIU/L)             | 279 ± 45 (178)                                                                                                                                | 154 ± 72 (59)                                                                                                                                   |
| BMI                           | 28.1 ± 2 (28)                                                                                                                                 | 27.8 ± 1 (27)                                                                                                                                   |
| Asthma medications            | systemic steroids: 2 patients<br>Omalizumab: 2<br>ICS/LABA: 8<br>LTI: 2<br>SABA: 8<br>Tiotropium: 2                                           | ICS/LABA: 3<br>SABA: 6                                                                                                                          |

FEV1: Forced expiratory volume in the 1<sup>st</sup> second; PC20: Provocation concentration needed to induce a 20% drop in FEV1; BMI: Bone mass index; GERD: Gastroesophageal reflux disease; ICS: inhaled corticosteroid; LABA: Long-acting beta agonist; SABA: Short-acting beta agonist; LTI: leukotriene inhibitor;  
 $\alpha$ : number in the parenthesis indicates median; \*: P<0.05, Mann-Whitney U test; a: performed with 35 patients
