# Supplementary material for: Sprouty2 positively regulates T cell function and airway inflammation through regulation of CSK and LCK kinases
Source: PubMed Central journal article supplement (PMC7971865; doi:10.1371/journal.pbio.3001063), 2021-03-08
Supplement: pbio.3001063.s002.pdf [file pbio.3001063.s002.pdf]

Supplementary Table: 2

**Reagent List:**

| <b>Flowcytometry</b> | <b>Antibody</b> | <b>Clone</b> | <b>Cat#</b> | <b>Vendor</b> |
|----------------------|-----------------|--------------|-------------|---------------|
|                      | CD4             | GK1.5        | 100428      | Biolegend     |
|                      | CD8             | 53-6.7       | 100725      | Biolegend     |
|                      | Bcl2            | BCL/10C4     | 633508      | Biolegend     |
|                      | Ki67            | 16A8         | 652404      | Biolegend     |
|                      | IL-2            | JES6-5H4     | 503808      | Biolegend     |
|                      | IL-4            | 11B11        | 504104      | Biolegend     |
|                      | IFN- $\gamma$   | XMG1.2       | 505850      | Biolegend     |
|                      | IL-17A          | TC11-18H10.1 | 506904      | Biolegend     |
|                      | hCD4            | OKT4         | 317410      | Biolegend     |
|                      | p-ERK1/2        | 4B11B69      | 675504      | Biolegend     |
|                      | Annexin-V       |              | 550474      | BD            |
|                      | Spry2           |              | ab60719     | Abcam         |
|                      | CD25            | PC61         | 102026      | Biolegend     |

**Immunoblotting**

| Antibody                              | Cat#       | Vendor             |
|---------------------------------------|------------|--------------------|
| Spry2                                 | 14954      | CST                |
| GATA3                                 | 5852       | CST                |
| p-LCK Y505                            | 2751       | CST                |
| p-ERK                                 | 8544       | CST                |
| ERK                                   | 4696       | CST                |
| Caveolin-1                            | 3267       | CST                |
| Na <sup>+</sup> K <sup>+</sup> ATPase | 3010       | CST                |
| GAPDH                                 | 3683       | CST                |
| Actin                                 | 12262      | CST                |
| Tubulin                               | 5346       | CST                |
| p-Tyr                                 | 9411       | CST                |
| Ubiquitin                             | 14049      | CST                |
| p-STAT5                               | 9359       | CST                |
| STAT5                                 | 94205      | CST                |
| p-STAT6                               | 56554      | CST                |
| STAT6                                 | 5397       | CST                |
| T-bet                                 | 644801     | Biolegend          |
| ROR $\gamma$ T                        | 14-6980-80 | eBioscience        |
| p-CSK S364                            | orb156471  | Biorbyt            |
| CSK                                   | sc166560   | Santa Cruz Biotech |
| Cbp/PAG-1                             | ab155100   | Abcam              |
| p-LCK Y394                            | SAB4300118 | Sigma              |
| LCK                                   | SAB2502039 | Sigma              |
| p-ZAP70                               | 2701       | CST                |
| ZAP70                                 | 32760      | Santa Cruz         |
| p-CD3 $\zeta$                         | SAB4301233 | Sigma              |
| CD3 $\zeta$                           | sc-1239    | Santa Cruz         |

**IHC and IF**

| Antibody | Clone | Cat#       | Vendor                | Dilution |
|----------|-------|------------|-----------------------|----------|
| CD4      | 4SM95 | 14-9766-82 | eBioscience           | 1/10     |
| NFATc2   |       | sc-7296    | Santa Cruz<br>Biotech | 1/100    |
| CSK      |       | sc-166560  | Santa Cruz<br>Biotech | 1/100    |
| LCK      |       | sc-13      | Santa Cruz<br>Biotech | 1/100    |
| Sprouty2 |       | orb103535  | Biorbyt               | 1/100    |

|               |            |             |       |
|---------------|------------|-------------|-------|
| CholeraToxinB | C-34778    | Molecular   | 1/100 |
| Caveolin-1    | 3267       | probes      | 1/200 |
| p-LCK Y505    | ABIN743588 | CST         | 1/100 |
|               |            | antibodies- |       |
|               |            | online      |       |
